# Supplementary material for: Mechanically durable and long-term repairable flexible lubricant-infused monomer for enhancing water collection efficiency by manipulating droplet coalescence and sliding
Source: Royal Society of Chemistry journal article supplement (doi:10.1039/d0na00003e), 2020-01-01
Supplement: d0na00003e1.pdf [file d0na00003e1.pdf]

### Supporting information

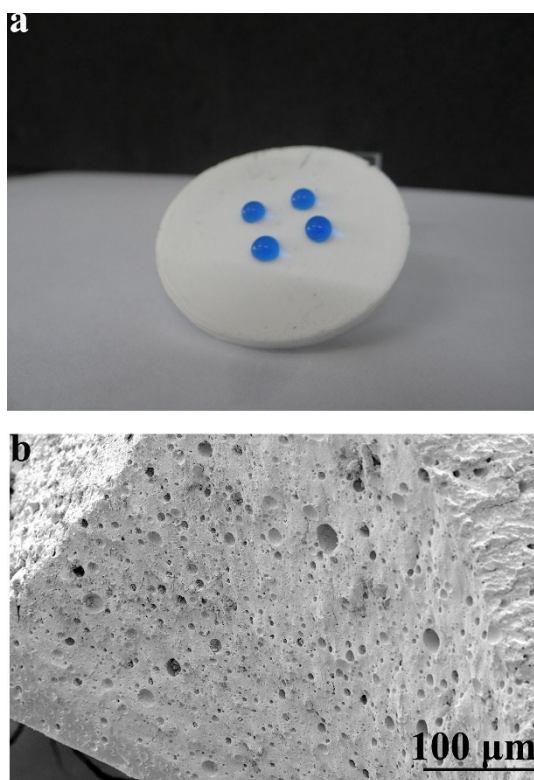

Fig. S1 (a) The water droplets were pinned on superhydrophobic surface without abrasion. (b) The section of superhydrophobic monomer.

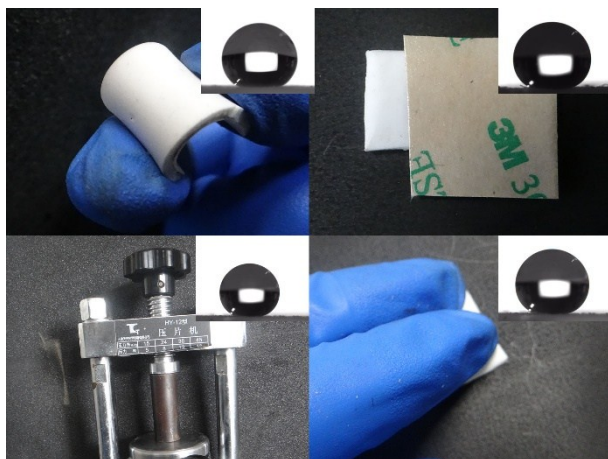

Fig. S2 the mechanical properties of superhydrophobic monomer.

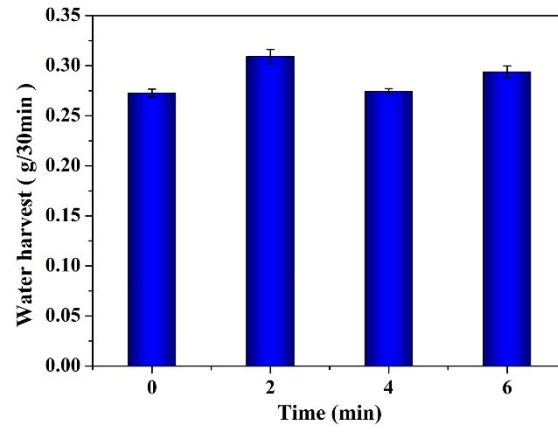

Fig. S3 water collection varies with compression frequency during 30 min. ( $S=5.7 \text{ mm}^2$ )
